# Supplementary material
Source: PubMed Central journal article supplement (PMC3839728)
Supplement: 1316194110_pnas.201316194SI.pdf [file 1316194110_pnas.201316194SI.pdf]

# Supporting Information

Orzalli et al. 10.1073/pnas.1316194110

## SI Materials and Methods

Antibodies used in Western blot experiments were mouse anti-IFI16 (ab55328; 1:2,000; Abcam), mouse anti-GAPDH (G041; 1:5,000; Applied Biological Materials), rabbit anti-TMEM173 (ab92650; 1:2,000; Abcam), mouse anti-ICP0 (1:1,000; EastCoast Bio), mouse anti- $\beta$ -tubulin (clone JDR.3B8; 1:2,000; Sigma-Aldrich), mouse anti-Myc (9E10; 1:2,000; Santa Cruz Biotechnology), mouse anti-large T antigen (pab419; 1:50) (1). HRP-

conjugated goat antibodies were used at 1:5,000 to 1:20,000 (Santa Cruz Biotechnology).

Antibodies used for indirect immunofluorescence studies were mouse anti-IFI16 (ab55328; 1:200; Abcam), rabbit anti-ICP8 (3-83; 1:500) (2), rabbit anti-PML (1:100; Santa Cruz Biotechnology), and mouse anti-ICP4 (39S; 1:200) (3). Goat anti-mouse Alexa-488 (Jackson ImmunoResearch) and anti-rabbit Alexa 594 (Jackson ImmunoResearch) were used at 1:500 for secondary detection.

1. Harlow E, Crawford LV, Pim DC, Williamson NM (1981) Monoclonal antibodies specific for simian virus 40 tumor antigens. *J Virol* 39(3):861–869.
2. Knipe DM, Senechek D, Rice SA, Smith JL (1987) Stages in the nuclear association of the herpes simplex virus transcriptional activator protein ICP4. *J Virol* 61(2):276–284.

3. Showalter SD, Zweig M, Hamper B (1981) Monoclonal antibodies to herpes simplex virus type 1 proteins, including the immediate-early protein ICP 4. *Infect Immun* 34(3):684–692.

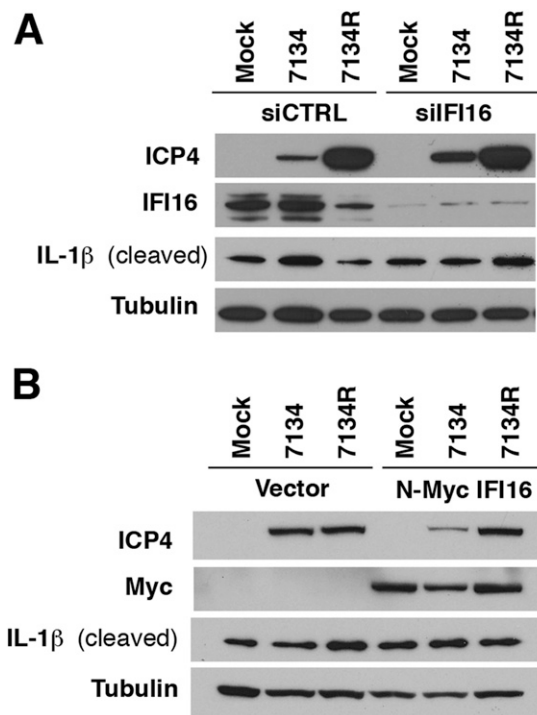

**Fig. S1.** Depletion or overexpression of IFI16 does not result in increased IL-1 $\beta$  cleavage. (A) Nontargeting control siRNA (siControl)- or siRNA specific for *IFI16* (siIFI16)-transfected human foreskin fibroblasts (HFFs) were infected with the 7134 virus and its corresponding rescued virus (7134R) at a multiplicity of infection (MOI) of 1. Protein lysates were examined for IL-1 $\beta$  cleavage at 6 h postinfection (hpi). IFI16 and ICP4 protein levels were examined to confirm knockdown efficiency and restrictive phenotype. (B) U2OS cells transfected with a vector or Myc-IFI16 construct were infected with the 7134 and 7134R viruses at MOI of 0.1. Lysates were harvested at 6 hpi and analyzed for the indicated proteins. Tubulin was used as a control for protein loading.
